# Supplementary material for: Comparative Genomics and Physiological Characterization of Two Aerobic Spore Formers Isolated from Human Ileal Samples
Source: MDPI journal article supplement (doi:10.3390/ijms232314946), 2022-11-29
Supplement: s1 [file s1]

### Supplementary Material

**Table S1.** Genes coding for vitamins found in SF106 and percentage of identity with proteins encoded by the reference strain *B. subtilis* 168.

| Vitamin   | Gene name    | Protein ID of <i>B. subtilis</i> 168 | protein identity (%) | Target protein |
|-----------|--------------|--------------------------------------|----------------------|----------------|
| <b>B1</b> | <i>tenA</i>  | CAB09525.1                           | 99.6                 | SF106_1808     |
|           | <i>tenI</i>  | QJF45101.1                           | 99.5                 | SF106_1807     |
|           | <i>thiO</i>  | QJF45100.1                           | 100                  | SF106_1806     |
|           | <i>thiS</i>  | QJR48708.1                           | 100                  | SF106_1805     |
|           | <i>thiG</i>  | NP_389051.1                          | 100                  | SF106_1804     |
|           | <i>thiF</i>  | NP_389052.1                          | 100                  | SF106_1803     |
|           | <i>thiD</i>  | QJF45097.1                           | 100                  | SF106_1802     |
|           | <i>ykoF</i>  | AQR85506.1                           | 100                  | SF106_1635     |
|           | <i>ykoE</i>  | AQR85505.1                           | 100                  | SF106_1636     |
|           | <i>ykoD</i>  | AQR85504.1                           | 100                  | SF106_1637     |
|           | <i>ykoC</i>  | AQR85503.1                           | 100                  | SF106_1638     |
|           | <i>ywbI</i>  | NP_391710.1                          | 100                  | SF106_3767     |
|           | <i>thiM</i>  | NP_391709.1                          | 100                  | SF106_3768     |
|           | <i>thiE</i>  | NP_391708.1                          | 100                  | SF106_3769     |
|           | <i>thiC</i>  | QJF41345.1                           | 100                  | SF106_2092     |
| <b>B2</b> | <i>ribD</i>  | QJF43944.1                           | 100                  | SF106_0787     |
|           | <i>ribE</i>  | NP_390208.1                          | 100                  | SF106_0788     |
|           | <i>ribBA</i> | AQR86551.1                           | 100                  | SF106_0789     |
|           | <i>ribH</i>  | AAA67484.1                           | 100                  | SF106_0790     |
|           | <i>ribT</i>  | QJF43948.1                           | 100                  | SF106_0791     |
|           | <i>nupP</i>  | QJF43123.1                           | 100                  | SF106_2704     |
|           | <i>nupQ</i>  | QJF43122.1                           | 99.7                 | SF106_2703     |
|           | <i>ribF</i>  | AQR85861.1                           | 99.7                 | SF106_1280     |
| <b>B5</b> | <i>ilvB</i>  | NP_390709.1                          | 100                  | SF106_0268     |
|           | <i>ilvH</i>  | NP_390708.2                          | 99.4                 | SF106_0269     |
|           | <i>ilvC</i>  | NP_390707.1                          | 100                  | SF106_0270     |
|           | <i>leuA</i>  | NP_390706.1                          | 99.81                | SF106_0271     |
|           | <i>panB</i>  | ABN11531.1                           | 100                  | SF106_0873     |
|           | <i>panC</i>  | NP_390123.1                          | 100                  | SF106_0874     |
|           | <i>panD</i>  | NP_390122.1                          | 100                  | SF106_0875     |
|           | <i>ilvD</i>  | NP_390070.2                          | 100                  | SF106_0929     |
|           | <i>coaA</i>  | NP_390257.2                          | 99.7                 | SF106_0737     |
|           | <i>coaX</i>  | NP_387951.2                          | 99.6                 | SF106_3930     |
|           | <i>panE</i>  | NP_389394.1                          | 100                  | SF106_1436     |
|           | <i>panE</i>  | NP_390070.2                          | 100                  | SF106_0929     |
|           | <i>panS*</i> | CAF1791342.1                         | 99.4                 | SF106_1002     |
| <b>B6</b> | <i>pdxT</i>  | QJF42193.1                           | 100                  | SF106_3980     |
|           | <i>pdxS</i>  | NP_387893.1                          | 100                  | SF106_3981     |
|           | <i>gabR</i>  | QJF41824.1                           | 100                  | SF106_2998     |
| <b>B8</b> | <i>bioW</i>  | NP_390902.3                          | 100                  | SF106_0075     |
|           | <i>bioA</i>  | QJF43255.1                           | 100                  | SF106_0076     |
|           | <i>bioF</i>  | QJF43256.1                           | 99.7                 | SF106_0077     |
|           | <i>bioD</i>  | QJF43257.1                           | 99.6                 | SF106_0078     |
|           | <i>bioB</i>  | QJF43258.1                           | 100                  | SF106_0079     |
|           | <i>bioI</i>  | NP_390897.1                          | 99.8                 | SF106_0080     |

|                    |              |             |      |            |
|--------------------|--------------|-------------|------|------------|
| <b>B9</b>          | <i>folB</i>  | NP_387959.1 | 100  | SF106_3922 |
|                    | <i>folP</i>  | NP_387958.1 | 100  | SF106_3923 |
|                    | <i>pabC</i>  | NP_387957.1 | 100  | SF106_3924 |
|                    | <i>pabA</i>  | NP_387956.1 | 100  | SF106_3925 |
|                    | <i>pabB</i>  | NP_387955.1 | 100  | SF106_3926 |
|                    | <i>folK</i>  | NP_387960.1 | 100  | SF106_3921 |
|                    | <i>folA</i>  | NP_391956.1 | 100  | SF106_3512 |
|                    | <i>dfrA</i>  | NP_390064.1 | 100  | SF106_0935 |
|                    | <i>mtrA</i>  | ABN13184.1  | 100  | SF106_0838 |
|                    | <i>mtrB</i>  | QJF43994.1  | 98.7 | SF106_0839 |
| <b>K2</b>          | <i>menF</i>  | NP_390961.1 | 100  | SF106_0016 |
|                    | <i>mend</i>  | NP_390960.1 | 99.8 | SF106_0017 |
|                    | <i>menH</i>  | NP_390959.1 | 100  | SF106_0018 |
|                    | <i>menB</i>  | NP_390958.1 | 100  | SF106_0019 |
|                    | <i>menE</i>  | NP_390957.1 | 100  | SF106_0020 |
|                    | <i>menC</i>  | NP_390956.1 | 100  | SF106_0021 |
|                    | <i>hepS</i>  | ABN13182.1  | 97.6 | SF106_0840 |
|                    | <i>menG</i>  | NP_390156.1 | 97.9 | SF106_0841 |
|                    | <i>hepT</i>  | ABN13180.1  | 99.1 | SF106_0842 |
|                    | <i>menI*</i> | AOR99459.1  | 96.8 | SF106_2693 |
|                    | <i>menA</i>  | NP_391728.1 | 100  | SF106_3749 |
| <b>Lipoic Acid</b> | <i>lipM</i>  | QJF43820.1  | 100  | SF106_0658 |
|                    | <i>lplJ</i>  | AQR85188.1  | 100  | SF106_1953 |
|                    | <i>lipA</i>  | QJF41942.1  | 100  | SF106_2875 |
|                    | <i>lipL</i>  | NP_391644.1 | 100  | SF106_3835 |

“\*” the strain of *B. subtilis* is not indicated

**Table S2.** Genes coding for vitamins found in SF174 and percentage of identity with proteins encoded by the reference strain *A. clausii* ENTPro.

|           | gene name    | protein ID of<br><i>A. clausii</i> ENTPro | protein identity<br>(%) | Target protein |
|-----------|--------------|-------------------------------------------|-------------------------|----------------|
| <b>B1</b> | <i>thiD</i>  | WP_035204020.1                            | 100                     | SF174_1998     |
|           | <i>thiE</i>  | WP_011246576.1                            | 100                     | SF174_2002     |
|           | <i>thiD</i>  | WP_035203906.1                            | 99.6                    | SF174_2111     |
|           | <i>thiM</i>  | WP_011247754.1                            | 99.6                    | SF174_4166     |
| <b>B2</b> | <i>ycsE</i>  | WP_011247403.1                            | 100                     | SF174_0272     |
|           | <i>ycsE</i>  | WP_011248796.1                            | 100                     | SF174_2249     |
|           | <i>ycsE</i>  | WP_011246931.1                            | 100                     | SF174_3980     |
|           | <i>ribF</i>  | WP_081427623.1                            | 100                     | SF174_0617     |
|           | <i>ribH</i>  | WP_011246656.1                            | 100                     | SF174_1917     |
|           | <i>ribBA</i> | WP_011246655.1                            | 100                     | SF174_1918     |
|           | <i>ribE</i>  | WP_011246654.1                            | 100                     | SF174_1919     |
|           | <i>ribD</i>  | WP_035205795.1                            | 100                     | SF174_2223     |
|           | <i>coaE</i>  | WP_011247549.1                            | 100                     | SF174_0124     |

|                    |               |                 |      |            |
|--------------------|---------------|-----------------|------|------------|
| <b>B5</b>          | <i>ilvD</i>   | WP_0112475489.1 | 100  | SF174_0186 |
|                    | <i>ilvG</i>   | WP_011247488.1  | 100  | SF174_0187 |
|                    | <i>ilvH</i>   | WP_035201833.1  | 100  | SF174_0188 |
|                    | <i>ilvC</i>   | WP_011247486.1  | 100  | SF174_0189 |
|                    | <i>coaA</i>   | WP_035201761.1  | 100  | SF174_0293 |
|                    | <i>coaD</i>   | WP_011247220.1  | 100  | SF174_0462 |
|                    | <i>panE</i>   | WP_011247211.1  | 99.7 | SF174_0471 |
|                    | <i>coaBC</i>  | WP_035201526.1  | 100  | SF174_0520 |
|                    | <i>coaBC</i>  | WP_035203438.1  | 99   | SF174_1525 |
|                    | <i>ilvE</i>   | WP_035204145.1  | 100  | SF174_1795 |
|                    | <i>coaX</i>   | WP_011244971.1  | 100  | SF174_3555 |
|                    | <i>panB</i>   | WP_011246910.1  | 99.6 | SF174_4003 |
|                    | <i>panC</i>   | WP_011246909.1  | 100  | SF174_4004 |
|                    | <i>panD</i>   | WP_0112466908.1 | 100  | SF174_4005 |
| <b>B6</b>          | <i>pdxR</i>   | WP_035205374.1  | 100  | SF174_0948 |
|                    | <i>pdxS</i>   | WP_011245312.1  | 100  | SF174_0949 |
|                    | <i>pdxT</i>   | WP_011245313.1  | 100  | SF174_0950 |
|                    | <i>pdxK</i>   | WP_035205840.1  | 100  | SF174_2279 |
| <b>K2</b>          | <i>folC</i>   | WP_035201802.1  | 100  | SF174_0212 |
|                    | <i>folE</i>   | WP_011246726.1  | 100  | SF174_1844 |
|                    | <i>phoA/B</i> | WP_011248786.1  | 100  | SF174_2259 |
|                    | <i>folA</i>   | WP_011247796.1  | 100  | SF174_2916 |
|                    | <i>pabB</i>   | WP_051881120.1  | 100  | SF174_3558 |
|                    | <i>pabA</i>   | WP_011244975.1  | 100  | SF174_3559 |
|                    | <i>pabC</i>   | WP_035202184.1  | 100  | SF174_3560 |
|                    | <i>folP</i>   | WP_035202185.1  | 100  | SF174_3561 |
|                    | <i>folB</i>   | WP_035202207.1  | 99.2 | SF174_3562 |
|                    | <i>folK</i>   | WP_011244979.1  | 100  | SF174_3563 |
| <b>Lipoic Acid</b> | <i>lipM</i>   | WP_011247334.1  | 100  | SF174_0347 |
|                    | <i>lipL</i>   | WP_035205862.1  | 100  | SF174_2302 |
|                    | <i>lipL1</i>  | WP_011246457.1  | 100  | SF174_2656 |
|                    | <i>lipA</i>   | WP_011247792.1  | 100  | SF174_2912 |

**Table S3.** Complete and incomplete phage-elements found in SF106 and percentage of identity with proteins encoded by the reference strain *B. subtilis* 168.

| phage-like element | Product                                        | Protein ID of <i>B. subtilis</i> 168 | protein identity (%) | Target protein |
|--------------------|------------------------------------------------|--------------------------------------|----------------------|----------------|
| <b>complete</b>    | ABC toxin/antitoxin/antitoxin system           | NP_389166.1                          | 100                  | SF106_1680     |
|                    | antitoxin B                                    | NP_389165.1                          | 100                  | SF106_1681     |
|                    | phage PBSX; N-acetylmuramoyl-L-alanine amidase | NP_389164.1                          | 100                  | SF106_1682     |

## Supplementary Material

|                                                              |                |      |            |
|--------------------------------------------------------------|----------------|------|------------|
| phage PBSX; holin                                            | NP_389163.1    | 100  | SF106_1683 |
| phage PBSX; putative enzyme                                  | NP_389162.1    | 100  | SF106_1684 |
| xepA                                                         | AAA22642.1     | 100  | SF106_1685 |
| xkdX                                                         | CAA94045.1     | 100  | SF106_1686 |
| xkdW                                                         | CAA94044.1     | 100  | SF106_1687 |
| xkdV                                                         | CAA94043.1     | 100  | SF106_1688 |
| phage PBSX; conserved hypothetical protein                   | YP_003097716.1 | 98.9 | SF106_1689 |
| xkdU                                                         | CAA94042.1     | 99.5 | SF106_1690 |
| xkdT                                                         | CAA94041.1     | 100  | SF106_1691 |
| xkdS                                                         | CAA94040.1     | 100  | SF106_1692 |
| xkdR                                                         | CAA94039.1     | 100  | SF106_1693 |
| xkdQ                                                         | CAA94050.1     | 100  | SF106_1694 |
| xkdP                                                         | CAA94038.1     | 100  | SF106_1695 |
| xkdO                                                         | NP_389150.2    | 100  | SF106_1696 |
| xkdN                                                         | QJF44995.1     | 100  | SF106_1697 |
| xkdM                                                         | CAA94035.1     | 100  | SF106_1698 |
| xkdK                                                         | CAA94066.1     | 100  | SF106_1699 |
| xkdJ                                                         | CAA94065.1     | 100  | SF106_1700 |
| xkdI                                                         | CAA94064.1     | 100  | SF106_1701 |
| xkdH                                                         | CAA94063.1     | 100  | SF106_1702 |
| phage PBSX; conserved hypothetical protein                   | YP_003097713.1 | 100  | SF106_1703 |
| xkdG                                                         | CAA94062.1     | 99.7 | SF106_1704 |
| xkdF                                                         | CAA94061.1     | 98.9 | SF106_1705 |
| xkdE                                                         | CAA94060.1     | 99.8 | SF106_1706 |
| phage PBSX; prophage terminase (large subunit)               | NP_389140.1    | 100  | SF106_1707 |
| phage PBSX; prophage terminase (small subunit)               | NP_389139.1    | 100  | SF106_1708 |
| phage PBSX; putative RNA polymerase sigma factor-like        | NP_389138.1    | 100  | SF106_1709 |
| xtrA                                                         | CAA94056.1     | 100  | SF106_1710 |
| xkdD                                                         | CAA94055.1     | 99.1 | SF106_1711 |
| phage PBSX; conserved hypothetical protein                   | YP_003097712.1 | 100  | SF106_1712 |
| xkdC                                                         | CAA94054.1     | 99.5 | SF106_1713 |
| xkdB                                                         | NP_389134.2    | 100  | SF106_1714 |
| phage PBSX; conserved hypothetical protein                   | YP_003097711.1 | 100  | SF106_1715 |
| xre                                                          | CAA84042.1     | 100  | SF106_1716 |
| phage PBSX; putative peptidase                               | NP_389132.3    | 99.5 | SF106_1717 |
| phage PBSX; manganese-containing peroxidase                  | NP_389131.2    | 100  | SF106_1718 |
| phage PBSX; gamma-polyglutamate hydrolase                    | NP_389130.1    | 100  | SF106_1719 |
| phage PBSX; conserved hypothetical protein                   | NP_389129.1    | 100  | SF106_1720 |
| phage PBSX; N-acetylmuramoyl-L-alanine amidase               | NP_389128.1    | 99.7 | SF106_1721 |
| putative enzyme                                              | NP_389127.2    | 100  | SF106_1722 |
| phosphatase RapA inhibitor PhrA                              | NP_389126.1    | 100  | SF106_1723 |
| Phage-like element PBSX protein XtrA                         | WP_003244900.1 | 38.5 | SF106_0483 |
| conserved phage protein of unknown function                  | NP_390500.1    | 100  | SF106_0484 |
| hypothetical protein; skin element                           | NP_390498.1    | 100  | SF106_0485 |
| hypothetical protein; skin element                           | NP_390498.1    | 100  | SF106_0486 |
| putative phage-related terminase small subunit; skin element | NP_390497.1    | 100  | SF106_0487 |
| Phage terminase large subunit                                | AIY95529.1     | 74.5 | SF106_0488 |
| putative phage capsid protein; skin element                  | NP_390495.1    | 63.9 | SF106_0489 |
| putative phage head morphogenesis protein; skin element      | NP_390494.1    | 100  | SF106_0490 |
| conserved phage protein of unknown function                  | NP_390493.1    | 100  | SF106_0491 |
| Putative phage serine protease XkdF                          | CAA94061.1     | 62   | SF106_0492 |
| putative phage capsid protein                                | NP_390491.2    | 80.4 | SF106_0493 |
| hypothetical protein; skin element                           | NP_390490.1    | 99   | SF106_0494 |
| conserved phage protein of unknown function                  | NP_390489.2    | 50.9 | SF106_0495 |

|                   |                                                       |                |      |            |
|-------------------|-------------------------------------------------------|----------------|------|------------|
| <b>incomplete</b> | conserved phage protein of unknown function           | NP_390488.1    | 54.3 | SF106_0496 |
|                   | putative phage tail component                         | NP_390487.1    | 51   | SF106_0497 |
|                   | conserved phage protein of unknown function           | NP_390486.2    | 52.1 | SF106_0498 |
|                   | conserved phage protein of unknown function           | YP_003097763.1 | 54.7 | SF106_0499 |
|                   | putative phage tail sheath protein                    | NP_390485.2    | 100  | SF106_0500 |
|                   | putative tail tube protein                            | NP_390483.2    | 95.2 | SF106_0501 |
|                   | toxic peptide of toxin-antitoxin system; skin element | NP_390482.1    | 100  | SF106_0502 |
|                   | phage portal protein                                  | P45930.2       | 85.9 | SF106_0503 |
|                   | putative tape measure protein; skin element           | NP_390480.2    | 100  | SF106_0504 |
|                   | putative phage murein-binding protein; skin element   | NP_390479.1    | 83   | SF106_0505 |
|                   | conserved phage protein of unknown function           | NP_390478.1    | 100  | SF106_0506 |
|                   | conserved phage protein of unknown function           | NP_390477.1    | 100  | SF106_0507 |
|                   | conserved phage protein of unknown function           | NP_390476.1    | 85.8 | SF106_0508 |
|                   | putative phage baseplate assembly protein             | NP_390475.1    | 88.8 | SF106_0509 |
|                   | putative phage tail baseplate protein                 | NP_390474.2    | 86.9 | SF106_0510 |
|                   | conserved phage protein of unknown function           | NP_390473.1    | 76.7 | SF106_0511 |
|                   | phage PBSX; conserved hypothetical protein            | NP_389158.1    | 79.5 | SF106_0512 |
|                   | conserved phage protein of unknown function           | NP_389159.1    | 66.3 | SF106_0513 |
|                   | conserved phage protein of unknown function           | NP_390470.1    | 68.5 | SF106_0514 |
|                   | putative phage-related lytic exoenzyme                | NP_390469.1    | 56   | SF106_0515 |
|                   | putative holin; skin element                          | NP_390468.1    | 100  | SF106_0516 |
|                   | N-acetylmuramoyl-L-alanine amidase; skin element      | NP_390467.1    | 64.7 | SF106_0517 |
|                   | hypothetical protein; skin element                    | NP_390466.1    | 100  | SF106_0518 |

**Table S4.** Complete and incomplete phage-elements found in SF174 and percentage of identity with proteins encoded by the reference strain *A. clausii* ENTPro.

| phage-like element | Product                                    | Protein ID of <i>A. clausii</i> ENTPro | protein identity (%) | Target protein |
|--------------------|--------------------------------------------|----------------------------------------|----------------------|----------------|
| <b>complete</b>    | terminase small subunit                    | WP_035201295.1                         | 100                  | SF174_4112     |
|                    | PBSX family phage terminase large subunit  | WP_035201291.1                         | 100                  | SF174_4113     |
|                    | phage portal protein                       | WP_035201276.1                         | 100                  | SF174_4114     |
|                    | phage head morphogenesis protein           | WP_035201273.1                         | 100                  | SF174_4115     |
|                    | hypothetical protein                       | WP_035201270.1                         | 100                  | SF174_4116     |
|                    | DUF4355 domain-containing protein          | WP_051881081.1                         | 100                  | SF174_4117     |
|                    | hypothetical protein                       | WP_035201266.1                         | 100                  | SF174_4118     |
|                    | major capsid protein                       | WP_035201263.1                         | 100                  | SF174_4119     |
|                    | hypothetical protein                       | WP_156323132.1                         | 100                  | SF174_4120     |
|                    | phage head-tail connector protein          | WP_035201260.1                         | 100                  | SF174_4121     |
|                    | hypothetical protein                       | WP_035201257.1                         | 100                  | SF174_4122     |
|                    | HK97 gp10 family phage protein             | WP_094978930.1                         | 100                  | SF174_4123     |
|                    | DUF3168 domain-containing protein          | WP_035201251.1                         | 100                  | SF174_4124     |
|                    | phage major tail protein, TP901-1 family   | WP_051881080.1                         | 100                  | SF174_4125     |
|                    | hypothetical protein                       | WP_051881079.1                         | 100                  | SF174_4126     |
|                    | hypothetical protein                       | WP_051881078.1                         | 98.7                 | ND             |
|                    | hypothetical protein                       | WP_151210677.1                         | 99.9                 | SF174_4127     |
|                    | phage tail family protein                  | WP_035201248.1                         | 100                  | SF174_4128     |
|                    | phage tail protein                         | WP_035201246.1                         | 100                  | SF174_4129     |
| <b>incomplete</b>  | helix-turn-helix transcriptional regulator | WP_142300536.1                         | 100                  | ND             |
|                    | hypothetical protein DB29_04200            | ALA55028                               | 97.7                 | ND             |
|                    | helix-turn-helix domain-containing protein | WP_035201332.1                         | 100                  | SF174_0758     |
|                    | hypothetical protein                       | WP_035201329.1                         | 100                  | SF174_0759     |
|                    | hypothetical protein                       | WP_156323130.1                         | 100                  | SF174_0760     |

|                                             |                |      |            |
|---------------------------------------------|----------------|------|------------|
| hypothetical protein                        | WP_035201326.1 | 100  | SF174_0761 |
| hypothetical protein                        | WP_051881085.1 | 100  | SF174_0762 |
| hypothetical protein                        | WP_169024188.1 | 100  | SF174_0763 |
| hypothetical protein                        | WP_051881084.1 | 100  | SF174_0764 |
| DUF6011 domain-containing protein           | WP_035201322.1 | 98.6 | SF174_0766 |
| hypothetical protein                        | WP_035201320.1 | 100  | SF174_0767 |
| single-stranded DNA-binding protein         | WP_035201318.1 | 100  | SF174_0768 |
| hypothetical protein                        | WP_035201316.1 | 100  | SF174_0770 |
| Holliday junction resolvase RecU            | WP_035201314.1 | 100  | SF174_0771 |
| DNA adenine methylase                       | WP_035201312.1 | 100  | SF174_0772 |
| BRO family protein                          | WP_051881083.1 | 100  | SF174_0773 |
| XtrA/YqaO family protein                    | WP_035201311.1 | 100  | SF174_0774 |
| hypothetical protein DB29_04216             | ALA55044.1     | 97.7 | ND         |
| sigma-70 family RNA polymerase sigma factor | WP_035201304.1 | 100  | SF174_0777 |

ND= Not Determined

**Table S5.** Genes associated to antibiotic resistance present in the SF106 or SF174 genome.

| Antibiotic             | Query      | Description                                                   | locus            |
|------------------------|------------|---------------------------------------------------------------|------------------|
| <b>Streptomycin</b>    | SF106_0428 | aminoglycoside 6-adenylyltransferase                          | core             |
|                        | SF174_0915 | Small Multidrug Resistance protein                            | core             |
| <b>Chloramphenicol</b> | SF174_1140 | Arabinose efflux permease                                     | core             |
|                        | SF174_2789 | Methylates position 8 of adenine 2503 in 23S rRNA.            | accessory(12/14) |
|                        | SF174_4186 | effector of chloramphenicol resistance in bacteria            | accessory (9/14) |
| <b>Erythromycin</b>    | SF174_1556 | Erythromycin esterase                                         | core             |
|                        | SF174_2668 | Erythromycin esterase                                         | accessory(12/14) |
| <b>Clindamycin</b>     | SF174_1582 | Ribosomal RNA adenine dimethylases                            | core             |
| <b>Kanamycin</b>       | SF174_3794 | Protein of unknown function (DUF1679)                         | core             |
| <b>Streptomycin</b>    | SF174_1377 | Streptomycin adenylyltransferase                              | core             |
|                        | SF174_1427 | Streptomycin adenylyltransferase                              | core             |
|                        | SF174_1758 | Mediates bacterial resistance to the antibiotics streptomycin | accessory (9/14) |
| <b>Tetracyclin</b>     | SF174_0916 | Transcriptional regulator                                     | core             |
|                        | SF174_1786 | Transcriptional regulator                                     | core             |
|                        | SF174_3373 | Elongation factor G, domain IV                                | core             |
| <b>Vancomycin</b>      | SF174_1636 | VanW like protein                                             | core             |

**Figure S1:** Organization of the gene cluster involved in the production of vitamins in SF106 (left) and SF174 (right).

**Figure S2:** Organization of the antimicrobial peptides biosynthetic gene cluster in SF106 (**A**, **B** and **C**) and SF174 (**D**).
